# Supplementary material
Source: publisher site journal article supplement (https://www.degruyter.com/publication/journal_key/CLLT/downloadAsset/CLLT_Instructions_for_Authors.pdf)
Supplement: Supplementary file 1 [file CLLT_Instructions_for_Authors.pdf]

# Corpus Linguistics and Linguistic Theory

## Instructions for Authors

### 1. Submitting an article for publication

*Corpus Linguistics and Linguistic Theory* invites submissions of high-calibre original research that directly advances either our understanding of corpus-linguistic methodologies as they reflect on, or imply changes to, linguistic theory, and/or directly address theoretically motivated issues.

Manuscripts should represent original work, should not be published elsewhere or in another language, and should not be submitted to other journals simultaneously. *Corpus Linguistics and Linguistic Theory* currently does not publish book reviews.

Submissions should be written in English. Contributors whose native language is not English should have their manuscripts read by a competent speaker before submission. Examples in a language other than English must be complemented by aligned interlinear glosses and an idiomatic translation.

#### Submitting the main article

Manuscripts for consideration in *Corpus Linguistics and Linguistic Theory* should be submitted via the online [submission system](#) to the Editor. *Corpus Linguistics and Linguistic Theory* supports a double-blind review process, with graded blinding options for the authors (see *Peer Review* below).

Therefore, please prepare the main document for your submission according to the blinding type you choose. Independent of which type of blinding you choose for your article, please be sure that title, abstract, and keywords are included in your *Main Document* (word file).

#### Submitting the revised article

When submitting a revision of your manuscript, please upload three documents: 1) the anonymised version of the revised article with the file designation 'Main Document'; 2) a second version of the revised article with all author information added, including non-anonymised citations (please save this second version as a ZIP archive before you upload it and upload it with the file designation 'Source Codes (tex, cls, sty etc.) as ZIP archive') and 3) a document with a point-by-point response to the reviewers' and/or editor's comments. This document should also be anonymised and uploaded with the file designation 'Author's Response to reviewer / Editor Critique (only revisions and Resubmissions)' file type.

### 2. Formatting, style and formal requirements

In general, manuscripts should be prepared in accordance with the [De Gruyter Mouton Journal style sheet](#).

#### Citations and references

Brief citations are used within the text as follows:

One author: (Bouissac 1985)

Two authors: (Smith and Jones 1995)

Three or more authors: (Ameka et al. 2006), but please do list all authors in the reference entry  
For further examples please see the De Gruyter Mouton Journal style sheet.

References should conform to the following examples:

*Book (authored work):*

Chomsky, Noam. 1986. Knowledge of language: Its nature, origin, and use. New York: Praeger.

*Journal article:*

Neuman, Yair, Yotam Lurie & Michele Rosenthal. 2001. A watermelon without seeds: A case study in rhetorical rationality. Text 21(4). 543–565.

For further examples please see the De Gruyter Mouton Journal style sheet.

### **Extent**

The length of the manuscript (including tables, figures, and references) should not exceed 65,000 characters, including white spaces.

### **Formatting**

The manuscript should be double-spaced (including notes and references) with standard margins. All pages should be numbered serially. Non-English words should appear in italics. Please do not use boldface type for emphasis. Use double quotation marks only, except for translations, where single quotation marks should be used.

Please refer to the De Gruyter Mouton Journal style sheet for further information. Please note, while the manuscript does not have to be formatted according to the style guidelines for submission, manuscripts accepted for publication will have to be formatted according to the guidelines before final acceptance.

### **Formal requirements**

Accepted formats for submission are: doc, odt, pdf, and LaTeX.

In order to be considered, submissions should contain the following documents with the described content:

- Main document: abstract of 100-150 words; keywords; anonymised article.
- Title Page: names, affiliations and contact information for all authors.
- Author Short Biography: Short biography for each author; 500 characters including spaces.

Please note that figures must be reproducible originals and should be clearly numbered and referenced in the main document and their approximate position should be indicated. Figure and Table files should be uploaded separately (you will be guided through all steps of the uploading process in the system). Notes should be kept to an absolute minimum, be brief and contain no diagrams or tables.

If you want to work in LaTeX, please create a PDF file of your entire manuscript and upload the PDF with the file designation 'Main Document'. Please put your LaTeX file(s) into a zip archive and upload it with the file designation 'Source Codes (tex, cls, sty etc.) as Zip archive'.

### 3. Peer review

Manuscript submissions will first be screened by the Editor and/or member(s) of the Editorial Board to ensure thematic fit and sufficient quality. If a manuscript is considered appropriate for review, it will be sent out to a minimum of three reviewers. Usually, authors will receive an editorial decision within 120 days after submission. The review process is double blind: Reviewers are not disclosed to authors, and authors are not disclosed to reviewers. In recognition of the fact that manuscripts vary in the extent to which self-citations are used, *Corpus Linguistics and Linguistic Theory* supports several manuscript blinding alternatives. Authors are required to choose one or a combination of the following blinding alternatives in order to prevent delays in initial manuscript processing. Authors are also required to clearly indicate their blinding choice in the cover letter as part of the submission process.

- *Full Blinding.* In the body of the manuscript, replace all citations and references which contain all authors' and co-authors' names and the publication year by writing: Author (xxxx) or (Author, xxxx). In the reference list, ensure that the entire citation is blinded (including year, title, journal, etc.) and that the citation is located at the top of the reference list.
- *Partial Blinding.* Replace only a portion of selected references by writing Author (xxxx) or (Author, xxxx) to the extent that authors' anonymity can be best preserved. In the reference list, keep full citation for the references that remained intact in the body of the manuscript but blind those references (including year, title, journal, etc.) you chose to blind, placing them at the top of the reference list.
- *Referring to Own Work in the Third Person.* In many cases, reviewers need to have access to essential citations in a manuscript, particularly when these are used to motivate current work. If these citations are based on authors' and/or co-authors' prior research, blinding such work might be revealing of authors' identity and make it difficult for reviewers to adequately evaluate manuscripts. In such cases, in the body of the manuscript, authors should describe their own and their co-authors' relevant work in the third person, as one normally would refer to other researchers' work in a published manuscript. In the list of references, provide full citations for own work, placing those in the appropriate location alphabetically.

Again, in the cover letter to the Editor, clearly indicate how the submission has been blinded in order to avoid processing delays.

### 4. Proofs

After final acceptance, authors will receive PDF proofs for correction, which must be returned by dates given in the production schedule.

### 5. Offprints

Upon publication, authors will receive electronic offprints (in PDF format) of their contribution. Guest editors of special issues will receive complimentary print copies of the issue.
